# Supplementary material for: Glucocerebrosidase, a Parkinson´s disease-associated protein, is imported into mitochondria and regulates complex I assembly and function
Source: Research Square preprint supplement (doi:10.21203/rs.3.rs-1521848/v1), 2022-05-02
Supplement: Supplementary file 5 [file 7a1fc806d8c8aa58ee41a4b5.docx]

**Supplementary Table 3. List of antibodies.**

| **TARGET** | **HOST** | **ICC** | **WB/*IP** | **Brand** | **Cat ID/RRID** |
| --- | --- | --- | --- | --- | --- |
| ATP5B | Mouse |  | 1:1000 | Santa Cruz Biotechnology | sc-135903/ RRID:AB_2061898 |
| α-Synuclein | Mouse | 1:250 |  | BD Bioscience | 610787/ RRID:AB_398108 |
| ß-Actin | Mouse |  | 1:5000 | Santa Cruz Biotechnology | Sc-47778/ RRID:AB_2714189 |
| Calnexin (TO-5) | Mouse |  | 1:200 | Santa Cruz Biotechnology | sc-80645/ RRID:AB_1119919 |
| DJ-1 | Mouse |  | 1:1000 | Santa Cruz Biotechnology | sc-55572/ RRID:AB_831639 |
| DYKDDDDK Tag (Flag) | Rabbit | 1:1000 | 1:1000 | Cell Signaling Technology | 14793S/ RRID:AB_2572291 |
| FOXA2 | Goat | 1:100 |  | Santa Cruz Biotechnology | Sc-6553/ RRID:AB_2104865 |
| FOXA2 | Mouse | 1:100 |  | Santa Cruz Biotechnology | Sc-101060/ RRID:AB_1124660 |
| GCase MaxPab | Rabbit |  | *5 µg/mg | Abnova | H00002629-D01/ RRID:AB_10658489 |
| GCase | Mouse |  | 1:1000 | Sigma Aldrich | WM0002629M1**/** RRID:AB_1841779 |
| GCase | Rabbit | 1:100 |  | Proteintech | 20622-1-AP/ RRID:AB_10696317 |
| GFP | Mouse | 1:500 |  | Sigma Aldrich | G6539/ RRID:AB_259941 |
| GRP78 | Rabbit |  | 1:8000 | Proteintech | 11587-1-AP/ RRID:AB_2119855 |
| GRP94 | Rabbit |  | 1:1000 | Proteintech | 14700-1-AP/ RRID:AB_2233347 |
| HEXB | Mouse |  | 1:1000 | Santa Cruz Biotechnology | Sc-376781/ RRID:AB_2909474 |
| HSC70/HSPA8 | Rabbit |  | 1:1000 | Cell Signaling Technology | 8444S/ RRID:AB_10831837 |
| HSC70 | Mouse |  | 1:1000 | Santa Cruz Biotechnology | sc-7298/ RRID:AB_627761 |
| HSP60 | Rabbit | 1:2000 |  | Cell Signaling Technology | 12165/ RRID:AB_2636980 |
| HSP60 | Mouse | 1:2000 | *1:3000 | Santa Cruz Biotechnology | sc-271215/ RRID:AB_10607973 |
| LAMP1 | Mouse |  | 1:100 | DSHB | H4A3/RRID:AB_2296838 |
| LIMP2 | Rabbit |  | *1:500 | ProSci | 4621/RRID:AB_10904468 |
| LONP1 | Rabbit |  | 1:2000 | Proteintech | 15440-1-AP/ RRID:AB_2137152 |
| LONP1 | Mouse | 1:100 | 1:5000 | Proteintech | 66043-1-lg/ RRID:AB_2881494 |
| MAP2 | Chicken | 1:2500 |  | Biolegend | 82250/ RRID:AB_291541 (previously Covance) |
| NDUFA9 | Mouase |  | 1:5000, BNE  1:10000, SDS-PAGE | Abcam | ab14713/ RRID:AB_301431 |
| NDUFA10 | Mouse |  | 1:4000 | Santa Cruz | sc-376357/ RRID:AB_10990305 |
| OTX2 | Goat | 1:200 |  | Neuromics | GT15095/ RRID:AB_2157174 |
| S100B | Mouse | 1:500 |  | Sigma-Aldrich | S2532/ RRID:AB_477499 |
| SDHA | Mouse |  | 1:5000, BNE  1:10000, SDS-PAGE | Abcam | Ab14715/ RRID:AB_301433 |
| SOX2 | Mouse | 1:200 |  | Abcam | Ab75485/ RRID:AB_1278243 |
| Synaptophysin | Mouse | 1:500 |  | Proteintech | CL488-67864/ RRID:AB_2909472 |
| ß3-Tubulin | Mouse | 1:1000 |  | Biolegend | 801202/ RRID:AB_10063408 |
| ß3-Tubulin | Rabbit | 1:1000 |  | Biolegend | 802001/ RRID:AB_2564645 (previously Covance) |
| TBC1D15 | Rabbit |  | 1:2500 | Novus Biologicals | NBP2-36552/ RRID:AB_2904547 |
| TIMMDC1 | Mouse |  | 1:1000  *1:100 | Santa Cruz | sc-514927/ RRID:AB_2909473 |
| TIM23 | Rabbit |  | 1:1000 | Proteintech | 11123-1-AP/ RRID:AB_615045 |
| TOM20 | Mouse | 1:500 | 1:1000 | Santa Cruz Biotechnology | sc-11415/ RRID:AB_2207533 |
| TOM70 | Rabbit |  | 1:1000 | ProteinTech | 14528-1-AP/ RRID:AB_2303727 |
| Tyrosine Hydroxylase | Rabbit | 1:500 |  | Pel-Freez Biologicals | P40101-150/ RRID:AB_2617184 |
| Vinculin | Mouse |  | 1:1000 | Santa Cruz Biotechnology | sc-73614/ RRID:AB_1131294 |
